# Supplementary material
Source: PubMed Central journal article supplement (PMC10230373)
Supplement: jamapediatr-e231387-s001.pdf [file jamapediatr-e231387-s001.pdf]

## Supplementary Online Content

Yang S, Gill PJ, Anwar MR, et al; Canadian Paediatric Inpatient Research Network (PIRN). Kidney ultrasonography after first febrile urinary tract infection in children: a systematic review and meta-analysis. *JAMA Pediatr*. Published online May 30, 2023. doi:10.1001/jamapediatrics.2023.1387

**eMethods.** Search Strategy

**eTable 1.** Definition of Clinically Important Abnormalities on Ultrasound Reported in Studies

**eTable 2.** Study Quality Assessment Tool and Response Explanation

**eTable 3.** Quality Assessment of Studies

**eTable 4.** Additional Study Characteristics

**eTable 5.** Kidney Ultrasound Reporting in Studies

**eResults.** Sensitivity Analyses for Outcome of Urinary Tract Abnormalities

**eTable 6.** Prevalence of Specific Abnormalities Detected on Kidney Ultrasound After First Episode Febrile Urinary Tract Infection

**eFigure 1.** Pooled Prevalence of Urinary Tract Abnormalities Detected on Kidney Ultrasound After First Febrile Urinary Tract Infection in Children, Subgroup Analyses

**eFigure 2.** Pooled Prevalence of Specific Abnormalities Detected on Kidney Ultrasound After First Febrile Urinary Tract Infection in Children

**eFigure 3.** Pooled Prevalence of Surgical Intervention of the Urinary Tract

This supplementary material has been provided by the authors to give readers additional information about their work.

33 **eMethods**

34

35 **Search Strategy**

36

37 **Appendix 1. Search Strategy**

38

39 MEDLINE (Ovid)

- 40 1. exp Urinary Tract Infections/
- 41 2. (urinary tract infection? or UTI or UTIs).tw,kf.
- 42 3. or/1-2
- 43 4. infant/ or exp infant, newborn/
- 44 5. Child, Preschool/
- 45 6. (babies or baby or infan\* or neonat\* or neo-nat\* or newborn\* or new-born\* or paediatric\* or
- 46 peadiatric\* or pediatric\* or toddler?).tw,kf.
- 47 7. (pediatric\* or paediatric\* or infan\* or child\*).jn,jw. or (pediatric\* or paediatric\* or infan\* or child\*).in.
- 48 8. or/4-7
- 49 9. exp Ultrasonography/
- 50 10. (renal adj5 (echograph\* or echotomograph\* or medical sonograph\* or ultrasonic diagnos\* or
- 51 ultrasonic imag\* or ultrasonic tomograph\* or ultrasonographic imag\* or ultrasonograph\* or
- 52 ultrasound?)).tw,kf.
- 53 11. (kidney? adj5 (echograph\* or echotomograph\* or medical sonograph\* or ultrasonic diagnos\* or
- 54 ultrasonic imag\* or ultrasonic tomograph\* or ultrasonographic imag\* or ultrasonograph\* or
- 55 ultrasound?)).tw,kf.
- 56 12. RBUS.tw,kf.
- 57 13. or/9-12
- 58 14. 3 and 8 and 13
- 59 15. Animals/ not (Animals/ and Humans/)
- 60 16. 14 not 15
- 61 17. limit 16 to yr="2000 -Current"

62

63 EMBASE (Ovid)

- 64 1. exp urinary tract infection/
- 65 2. (urinary tract infection? or UTI or UTIs).tw,kw.
- 66 3. or/1-2
- 67 4. exp infant/
- 68 5. preschool child/
- 69 6. (babies or baby or infan\* or neonat\* or neo-nat\* or newborn\* or new-born\* or paediatric\* or
- 70 peadiatric\* or pediatric\* or toddler?).tw,kw.
- 71 7. (pediatric\* or paediatric\* or infan\* or child\*).jn,jw. or (pediatric\* or paediatric\* or infan\* or child\*).in.
- 72 8. or/4-7
- 73 9. ultrasound/
- 74 10. (renal adj5 (echograph\* or echotomograph\* or medical sonograph\* or ultrasonic diagnos\* or
- 75 ultrasonic imag\* or ultrasonic tomograph\* or ultrasonographic imag\* or ultrasonograph\* or
- 76 ultrasound?)).tw,kw.
- 77 11. (kidney? adj5 (echograph\* or echotomograph\* or medical sonograph\* or ultrasonic diagnos\* or
- 78 ultrasonic imag\* or ultrasonic tomograph\* or ultrasonographic imag\* or ultrasonograph\* or
- 79 ultrasound?)).tw,kw.
- 80 12. RBUS.tw,kw.
- 81 13. or/9-12
- 82 14. 3 and 8 and 13
- 83 15. Animal experiment/ not (human experiment/ or human/)
- 84 16. (rat or rats or mouse or mice or swine or porcine or murine or sheep or lambs or pigs or piglets or
- 85 rabbit or rabbits or cat or cats or dog or dogs or cattle or bovine or monkey or monkeys or trout or
- 86 marmoset\$1).ti. and animal experiment/
- 87 17. or/15-16

- 88 18. 14 not 17  
89 19. limit 18 to yr="2000 -Current"  
90  
91 Cochrane Central Register of Controlled Trials (Ovid)  
92 1. exp Urinary Tract Infections/  
93 2. (urinary tract infection? or UTI or UTIs).tw,kw.  
94 3. or/1-2  
95 4. infant/ or exp infant, newborn/  
96 5. child, preschool/  
97 6. (babies or baby or infan\* or neonat\* or neo-nat\* or newborn\* or new-born\* or paediatric\* or  
98 peadiatric\* or pediatric\* or toddler?).tw,kw.  
99 7. (pediatric\* or paediatric\* or infan\* or child\*).jn,jw. or (pediatric\* or paediatric\* or infan\* or child\*).in.  
100 8. or/4-7  
101 9. exp ultrasonography/  
102 10. (renal adj5 (echograph\* or echotomograph\* or medical sonograph\* or ultrasonic diagnos\* or  
103 ultrasonic imag\* or ultrasonic tomograph\* or ultrasonographic imag\* or ultrasonograph\* or  
104 ultrasound?)).tw,kw.  
105 11. (kidney? adj5 (echograph\* or echotomograph\* or medical sonograph\* or ultrasonic diagnos\* or  
106 ultrasonic imag\* or ultrasonic tomograph\* or ultrasonographic imag\* or ultrasonograph\* or  
107 ultrasound?)).tw,kw.  
108 12. RBUS.tw,kw.  
109 13. or/9-12  
110 14. 3 and 8 and 13  
111 15. Animals/ not (Animals/ and Humans/)  
112 16. 14 not 15  
113 17. limit 16 to yr="2000 -Current"  
114  
115 PsycINFO (Ovid)  
116 1. (urinary tract infection? or UTI or UTIs).tw.  
117 2. (babies or baby or infan\* or neonat\* or neo-nat\* or newborn\* or new-born\* or paediatric\* or  
118 peadiatric\* or pediatric\* or toddler?).mp.  
119 3. ultrasound/  
120 4. (renal adj5 (echograph\* or echotomograph\* or medical sonograph\* or ultrasonic diagnos\* or  
121 ultrasonic imag\* or ultrasonic tomograph\* or ultrasonographic imag\* or ultrasonograph\* or  
122 ultrasound?)).tw.  
123 5. (kidney? adj5 (echograph\* or echotomograph\* or medical sonograph\* or ultrasonic diagnos\* or  
124 ultrasonic imag\* or ultrasonic tomograph\* or ultrasonographic imag\* or ultrasonograph\* or  
125 ultrasound?)).tw.  
126 6. RBUS.tw.  
127 7. or/3-6  
128 8. 1 and 2 and 7  
129 9. limit 8 to yr="2000 -Current"  
130  
131 CINAHL Plus (EBSCO)  
132 1. (MH "Urinary Tract Infections+")  
133 2. TI ( ("urinary tract infection#" or UTI or UTIs) ) OR AB ( ("urinary tract infection#" or UTI or UTIs) )  
134 3. S1 OR S2  
135 4. (MH "Infant+") OR (MH "Infant, Newborn+") OR (MH "Child, Preschool")  
136 5. TI ( babies or baby or infan\* or neonat\* or "neo-nat\*" or newborn\* or new-born\* or paediatric\* or  
137 peadiatric\* or pediatric\* or toddler# ) OR AB ( babies or baby or infan\* or neonat\* or "neo-nat\*" or  
138 newborn\* or new-born\* or paediatric\* or peadiatric\* or pediatric\* or toddler# )  
139 6. S4 OR S5  
140 7. (MH "Ultrasonography+")  
141 8. TI ( renal N5 (echograph\* or echotomograph\* or "medical sonograph\*" or "ultrasonic diagnos\*" or  
142 "ultrasonic imag\*" or "ultrasonic tomograph\*" or "ultrasonographic imag\*" or ultrasonograph\* or  
143 ultrasound#) ) OR AB ( renal N5 (echograph\* or echotomograph\* or "medical sonograph\*" or

- 144 "ultrasonic diagnos\*" or "ultrasonic imag\*" or "ultrasonic tomograph\*" or "ultrasonographic imag\*"  
145 or ultrasonograph\* or ultrasound#) )  
146 9. TI ( kidney# N5 (echograph\* or echotomograph\* or "medical sonograph\*" or "ultrasonic diagnos\*" or "ultrasonic imag\*" or "ultrasonic tomograph\*" or "ultrasonographic imag\*" or ultrasonograph\* or  
147 ultrasound#) ) OR AB ( kidney# N5 (echograph\* or echotomograph\* or "medical sonograph\*" or  
148 "ultrasonic diagnos\*" or "ultrasonic imag\*" or "ultrasonic tomograph\*" or "ultrasonographic imag\*" or ultrasonograph\* or  
149 ultrasound#) )  
150  
151 10. TI RBUS OR AB RBUS  
152 11. S7 OR S8 OR S9 OR S10  
153 12. S3 AND S6 AND S11  
154 13. (MH "Animals")  
155 14. (MH "Animals") AND (MH "Human")  
156 15. S13 NOT S14  
157 16. S12 NOT S15  
158 17. Limiters - Published Date: 20000101-20211231  
159

160 ClinicalTrials.gov (NIH)

- 161 • Ultrasonography | UTI | Child
  - 162 • Urinary tract infection and Ultrasound
  - 163 • Filters: Child (birth-17)
- 164  
165

166  
167  
168

**eTable 1. Definitions of clinically important abnormalities on kidney ultrasound reported in studies**

| <b>Study</b>     | <b>Clinically important abnormality definition described in study</b>                                                                                                                                                                                                                                                                                                                                                                                                                                                                                                                                                                                                                                                                                                                                                                                                                     |
|------------------|-------------------------------------------------------------------------------------------------------------------------------------------------------------------------------------------------------------------------------------------------------------------------------------------------------------------------------------------------------------------------------------------------------------------------------------------------------------------------------------------------------------------------------------------------------------------------------------------------------------------------------------------------------------------------------------------------------------------------------------------------------------------------------------------------------------------------------------------------------------------------------------------|
| Hoberman 2003*   | Treatment was altered by the identification of abnormalities on renal ultrasound.                                                                                                                                                                                                                                                                                                                                                                                                                                                                                                                                                                                                                                                                                                                                                                                                         |
| Hung 2016        | Significant urologic abnormalities were defined as those that impacted on subsequent management with a change of therapy, investigations, or follow-up (e.g., surgical intervention, parental counseling, and need for follow-up of renal function) based on initial renal ultrasound findings. Parental counseling was defined as specified for children with hypoplastic kidney, solitary kidney, and multicystic dysplastic kidney, which needed long term follow-up of renal function and growth of the kidneys, and counseling for avoidance of potential nephrotoxic agents or factors. Significant urologic abnormalities included ureteropelvic junction obstruction, ureterovesical junction obstruction, hypoplastic kidney, duplex kidney, ureterocele, solitary kidney, and cystic kidney disease that were usually not visualized by voiding cystourethrography examination. |
| Jahnukainen 2006 | Ultrasound findings that alone led to change in patient management.                                                                                                                                                                                                                                                                                                                                                                                                                                                                                                                                                                                                                                                                                                                                                                                                                       |
| Miron 2007*      | Anomaly that affected management of patient.                                                                                                                                                                                                                                                                                                                                                                                                                                                                                                                                                                                                                                                                                                                                                                                                                                              |
| Montini 2009*    | Clinical management influenced by renal ultrasound results.                                                                                                                                                                                                                                                                                                                                                                                                                                                                                                                                                                                                                                                                                                                                                                                                                               |
| Wallace 2020     | Abnormal renal ultrasounds were categorized into 3 categories based on the severity of findings. Abnormal findings were categorized into threshold A (mild abnormalities that could be incidental findings), B (moderate abnormalities that could lead to medical interventions, testing, or consultation), C (most severe, requiring close subspecialty follow-up and possible surgical intervention). The study provides further detail on which findings are classified as A, B, or C.                                                                                                                                                                                                                                                                                                                                                                                                 |
| Wong 2010        | Renal ultrasound detection of remediable abnormalities that require a change in management. Remediable urological abnormalities were arbitrarily defined as those abnormalities requiring surgical or medical intervention in addition to regular follow-up monitoring for urinary tract infection recurrence.                                                                                                                                                                                                                                                                                                                                                                                                                                                                                                                                                                            |
| Zamir 2003       | Impact on management was defined as a change of therapy, investigations, or follow up based on renal ultrasound results, that would not have been done otherwise.                                                                                                                                                                                                                                                                                                                                                                                                                                                                                                                                                                                                                                                                                                                         |

169  
170  
171  
172  
173

Descriptions include text from primary studies

\*Description of clinically important abnormality reported in the study results and not methods

174  
175

**eTable 2. Study Quality Assessment Tool and Response Explanation**

| <b>Criteria</b>                                                                              | <b>Response Explanation<br/>(Responses: Yes, No, Unclear, Not Applicable)</b>                                                                                                                                                                                                                       |
|----------------------------------------------------------------------------------------------|-----------------------------------------------------------------------------------------------------------------------------------------------------------------------------------------------------------------------------------------------------------------------------------------------------|
| a. Was the sample representative of the target population?                                   | Yes: Study focused on children with first febrile UTI, ages 0 to 24 months<br>No: Study included children older than 24 months of age                                                                                                                                                               |
| b. Were study participants recruited in an appropriate and clear way?                        | Yes if: planned recruitment of consecutive patients, all during a specified time period<br>No if: planned recruitment of non-consecutive patients, and/or recruitment of patients based on the performance of other imaging tests (e.g. only inclusion of children with ultrasound plus DMSA, VCUG) |
| c. Were the study subjects and the setting described in detail?                              | Yes if: described in sufficient detail, including whether children were hospitalized or not<br>No if: no description                                                                                                                                                                                |
| d. Were objective, standard criteria described for the diagnosis of UTI?                     | Yes if: provided criteria<br>No: did not provide criteria                                                                                                                                                                                                                                           |
| e. Were standard criteria described for abnormalities on US?                                 | Yes if: defined US abnormalities in methods<br>No if: did not define US abnormalities                                                                                                                                                                                                               |
| f. Was the condition measured reliably?                                                      | Yes if: description of how US was conducted<br>Unclear if: no or unclear reporting of US methods                                                                                                                                                                                                    |
| g. Was there appropriate statistical analysis?                                               | Yes if: statistical analysis reported with 95% CI for US abnormalities prevalence<br>No if: statistical analysis not reported for prevalence of US abnormalities with 95% CI                                                                                                                        |
| h. Was the sample size adequate?                                                             | Yes if: planned sample size was reported and justified for outcome of prevalence of US abnormalities<br>No: if planned sample size was not met<br>Unclear if: sample size not justified                                                                                                             |
| i. Was the data analysis conducted with sufficient coverage of the identified sample?        | Yes if: few withdrawals and/or missing data on ultrasound abnormality outcome that are explained<br>No if: too many withdrawals and/or missing data on ultrasound abnormality outcome or unexplained                                                                                                |
| j. Are all important confounding factors/subgroups/differences identified and accounted for? | Yes: authors identified and reported results for factors/subgroups (e.g. age, sex) that might be associated with ultrasound abnormalities<br>No: no factors/subgroups identified or reported with respect to ultrasound abnormalities                                                               |
| k. Were subpopulations identified using objective criteria?                                  | Yes: authors used objective criteria for defining subpopulations for US prevalence outcome<br>No: authors did not use objective criteria for defining subpopulations for US prevalence<br>Not applicable: if no subgroups were identified and accounted for                                         |

Quality assessment used adapted Joanna Briggs Institute Prevalence Critical Appraisal Tool

176  
177  
178  
179  
180

181  
182

**eTable 3. Quality Assessment of Studies**

| Study               | Criteria |   |   |   |    |   |   |   |   |   |    |
|---------------------|----------|---|---|---|----|---|---|---|---|---|----|
|                     | a        | b | c | d | e  | f | g | h | i | j | k  |
| Arlen 2014          | 1        | 1 | 1 | 1 | 1  | U | 0 | U | 0 | 0 | NA |
| Breinbjerg 2021     | 0        | 0 | 1 | 1 | 1  | U | 0 | U | 1 | 1 | 1  |
| Cheng 2011          | 0        | 0 | 1 | 1 | 0  | U | 0 | U | 1 | 0 | NA |
| Han 2016            | 0        | 0 | 1 | 1 | 0  | U | 0 | U | 1 | 0 | NA |
| Harper 2016         | 1        | 1 | 0 | 1 | 1  | U | 0 | U | 1 | 0 | NA |
| Hoberman 2003       | 1        | 1 | 1 | 1 | 1  | U | 0 | U | 1 | 0 | NA |
| Hsu 2016            | 1        | 1 | 1 | 1 | 1  | U | 0 | U | 1 | 1 | 1  |
| Huang 2008          | 0        | 1 | 1 | 1 | 0  | 1 | 0 | U | 1 | 0 | NA |
| Hung 2016           | 1        | 1 | 1 | 1 | 1  | 1 | 0 | U | 1 | 0 | NA |
| Ipek 2012           | 0        | U | 1 | 1 | 0  | U | 0 | U | 1 | 0 | NA |
| Ismaili 2011        | 0        | 1 | 1 | 1 | 1  | 1 | 0 | U | 1 | 0 | NA |
| Jahnukainen 2006    | 0        | 1 | 1 | 1 | 1  | 1 | 0 | U | 1 | 0 | NA |
| Kawai 2019          | 1        | 0 | 1 | 1 | 1  | U | 0 | U | 1 | 0 | NA |
| Kobayashi 2019      | 1        | 1 | 1 | 1 | 1  | 1 | 0 | U | 1 | 0 | NA |
| Lee 2009            | 1        | 0 | 1 | 1 | 1  | 1 | 0 | U | 1 | 0 | NA |
| Lertdumrongluk 2021 | 0        | 0 | 1 | 1 | 1  | 1 | 0 | U | 1 | 0 | NA |
| Lytzen 2011         | 0        | 1 | 1 | 1 | 0  | U | 0 | U | 1 | 1 | 1  |
| Miron 2007          | 1        | 1 | 0 | 0 | 1  | U | 0 | U | 1 | 0 | NA |
| Montini 2009        | 1        | 1 | 1 | 1 | 1  | 1 | 0 | U | 1 | 0 | NA |
| Pauchard 2017       | 1        | 1 | 1 | 1 | 1  | 1 | 0 | U | 1 | 0 | NA |
| Pennesi 2012        | 0        | 1 | 1 | 1 | 1  | U | 0 | U | 1 | 0 | NA |
| Pennesi 2021        | 0        | 0 | 1 | 1 | 1  | U | 0 | U | 1 | 1 | 1  |
| Sasaki 2012         | 1        | 1 | 1 | 0 | 0  | U | 0 | U | 1 | 0 | NA |
| Soccorso 2010       | 1        | 1 | 1 | 1 | 1  | U | 0 | U | 1 | 0 | NA |
| Wallace 2020        | 1        | 1 | 1 | 1 | 1  | U | 0 | 1 | 1 | 1 | 1  |
| Wongbencharat 2016  | 1        | 0 | 1 | 1 | 1  | 1 | 0 | U | 1 | 1 | 1  |
| Wong 2010           | 1        | 1 | 1 | 1 | _1 | U | 0 | U | 1 | 0 | NA |
| Yilmaz 2016         | 0        | 1 | 0 | 1 | 1  | U | 0 | U | 1 | 1 | 1  |
| Zamir 2004          | 0        | 1 | 1 | 1 | 1  | 1 | 0 | 1 | 1 | 0 | NA |

1 refers to Yes for criteria; 0 refers to No for criteria; U refers to Unclear; NA refers to Not Applicable  
 For criteria items a to k, refer to eTable 2 for criteria and explanation.  
 Quality assessment used adapted Joanna Briggs Institute Prevalence Critical Appraisal Tool

183  
184  
185  
186  
187

**eTable 4 Additional Study Characteristics**

| Author and publication year | <i>E.coli</i> UTI, No. (%) | Renal US timing                                           | Surgical Outcome Description in Methods                      | Surgical Outcome Follow-up Period | UTI definition as described in study methods                                                                                                                                                                                                                                                                                                                                                                                                                                 |
|-----------------------------|----------------------------|-----------------------------------------------------------|--------------------------------------------------------------|-----------------------------------|------------------------------------------------------------------------------------------------------------------------------------------------------------------------------------------------------------------------------------------------------------------------------------------------------------------------------------------------------------------------------------------------------------------------------------------------------------------------------|
| Arlen 2014                  | 313 (89)                   | NR                                                        | NR                                                           | NA                                | Positive urine culture defined as a single organism of greater than 50,000 CFU obtained by catheterization.                                                                                                                                                                                                                                                                                                                                                                  |
| Breinbjerg 2021             | 376 (89)                   | Within 6 weeks                                            | Surgical correction of VUR or anatomic anomalies were noted. | NR                                | Any growth of a known uropathogen in urine on suprapubic bladder aspiration, growth of $\geq 10^4$ CFU/ml in two consecutive clean catch midstream urine sample, or $\geq 10^3$ CFU/ml if sampling by catheterization, were considered positive. Children with bag-collected urine samples were excluded.                                                                                                                                                                    |
| Cheng 2011                  | NR                         | 1 <sup>st</sup> or 2 <sup>nd</sup> day of hospitalization | NR                                                           | NA                                | UTI was diagnosed in the setting of a minimum of $10^5$ CFU pathogen per ml in freshly voided mid stream urine or urine collected from a urinary bag, or more than $10^4$ CFU bacteria per ml in catheterized urine, or any bacteria isolated from the urine of suprapubic aspirations.                                                                                                                                                                                      |
| Han 2016                    | NR                         | Within first 5 days of admission                          | NR                                                           | NA                                | Pyuria ( $\geq 5$ WBCs per high-power field) and a positive urine culture collected from a clean-catch or catheterized specimen (defined as growth of a single organism to $\geq 100,000$ CFU/ mL),                                                                                                                                                                                                                                                                          |
| Harper 2016                 | 293 (92)                   | Within 1 week of first episode                            | NR                                                           | NA                                | Positive urinalysis and urine culture results ( $>10^5$ CFU/ml urine), with urine specimens collected through catheterization in girls and clean-catch in boys.                                                                                                                                                                                                                                                                                                              |
| Hoberman 2003               | 298 (96)                   | Within 48 hrs of diagnosis                                | NR (Outcome reported in results and discussion)              | 6 months                          | The presence of pyuria (10 or more WBC/mm <sup>3</sup> in uncentrifuged urine) and bacteriuria (1 or more gram-negative rods per 10 oil-immersion fields in a Gram's stained smear of uncentrifuged urine). Inclusion in the final study group required a positive urine culture (at least 50,000 CFU per mL, representing a single pathogen) from a specimen obtained by catheter.                                                                                          |
| Hsu 2016                    | 336 (86)                   | Within first 3 days of admission                          | NR                                                           | NR                                | Presence of pyuria [defined as $\geq 5$ WBC per high power field] and/or abnormal dipstick urinalysis (a positive nitrite or leukocyte esterase test); a positive urine culture, defined as any growth of a single bacterium in urine from a suprapubic bladder aspiration, $\geq 5 \times 10^4$ CFU/mL collected from a transurethral catheterized specimen, or growth of a single microorganism $\geq 10^5$ CFU/mL collected from the midstream clean-void urine specimen. |
| Huang 2008                  | NR                         | US was performed once UTI                                 | NR                                                           | NA                                | UTI was defined as a positive urine monoculture, greater than $10^3$ colony-forming units/mL in urine collected by suprapubic puncture or greater than $10^5$ colony-forming units/mL in urine collected either in                                                                                                                                                                                                                                                           |



|                  |          |                                                                 |                                   |    |                                                                                                                                                                                                                                                                                                                                                                                                                                                                                                                                                                                                                                                |
|------------------|----------|-----------------------------------------------------------------|-----------------------------------|----|------------------------------------------------------------------------------------------------------------------------------------------------------------------------------------------------------------------------------------------------------------------------------------------------------------------------------------------------------------------------------------------------------------------------------------------------------------------------------------------------------------------------------------------------------------------------------------------------------------------------------------------------|
|                  |          | was suspected                                                   |                                   |    | sterile bags or by midstream clean-voided sample.                                                                                                                                                                                                                                                                                                                                                                                                                                                                                                                                                                                              |
| Hung 2016        | 263 (85) | Within first 2 days of admission                                | NR                                | NR | Pyuria ( $\geq 5$ WBC per high-power field) and/or positive nitrite or leukocyte esterase tests, and presence of positive urine culture, defined as any growth of a single bacterium in urine from a suprapubic bladder aspiration, or growth of a single microorganism from $10^5$ colony forming units/mL collected from the midstream clean-void urine specimen of toilet-trained young children, or $10^4$ CFU/mL collected from a transurethral catheterized specimen.                                                                                                                                                                    |
| Ipek 2012        | 53 (80)  | Within 48rs after confirmation of UTI by urine culture findings | NR                                | NR | A positive urine culture with a single microorganism. Urine samples were obtained by suprapubic aspiration or transurethral catheterization in nontoilet-trained children and midstream clean-catch in toilet-trained children. Pyuria was defined as the presence of 5 leukocytes per a 40 objective high power field of urine. The diagnosis of UTI according to a positive urine culture was defined as any growth of a single bacterial pathogen from suprapubic aspiration, $\geq 10^5$ CFU/mL for midstream urine or $\geq 5 \times 10^4$ colony-forming units/mL of urine for transurethral catheterization.                            |
| Ismaili 2011     | 189 (91) | Within 48hrs                                                    | NR                                | NR | Positive urinalysis defined as a trace or greater result for leukocyte esterase and/or nitrite on dipstick or as the presence of 35 leukocytes/L of un centrifuged urine. UTI was confirmed in those children having growth of 100,000 CFU per milliliter in urine culture. In urine samples obtained by suprapubic aspiration, any growth of enteric Gram-negative pathogens was considered significant. All urine samples from children younger than 24 months were obtained by suprapubic aspiration or a single bladder catheterization. Urine samples from older children were obtained by clean catch or bladder single catheterization. |
| Jahnukainen 2006 | 141 (91) | Within 3 days                                                   | Surgical intervention             | NR | UTI was diagnosed by culturing urine specimens collected by suprapubic aspiration or two urinary bag specimens in children under 2 years of age and by midstream sample in older children. Single pathogen bacterial growth of 100,000 CFU/ml or more in two bag samples or in midstream specimen was considered significant. Any bacterial growth in urine obtained by subrapubic aspiration was considered significant.                                                                                                                                                                                                                      |
| Kawai 2019       | 54 (73)  | $\leq 1$ month after fUTI onset                                 | NR (Outcome reported in results.) | NR | Positive pyuria on urinalysis and a single organism $\geq 1 \times 10^5$ /mL was isolated on urine culture from a catheterized urinary sample.                                                                                                                                                                                                                                                                                                                                                                                                                                                                                                 |
| Kobayashi 2019   | 214 (93) | $\leq 1$ month after                                            | NR                                | NA | Single uropathogen isolated from a specimen taken by urethral catheterization; and positive urinalysis (WBC $\geq 5$ per high-power field,                                                                                                                                                                                                                                                                                                                                                                                                                                                                                                     |

|                           |          |                                                                |                                  |                                           |                                                                                                                                                                                                                                                                                                                                                                     |
|---------------------------|----------|----------------------------------------------------------------|----------------------------------|-------------------------------------------|---------------------------------------------------------------------------------------------------------------------------------------------------------------------------------------------------------------------------------------------------------------------------------------------------------------------------------------------------------------------|
|                           |          | diagnosis                                                      |                                  |                                           | positive leukocyte esterase test, positive nitrite test, or microscopy identification of bacteria); Lactobacillus spp., Corynebacterium spp., a-hemolytic streptococci and coagulase-negative staphylococci were considered contaminants.                                                                                                                           |
| Lee 2009                  | NR       | Within 3 days after admission                                  | NR (Outcome reported in results) | NR                                        | Positive results on a urine culture was defined as any growth of bacteria in urine from a suprapubic bladder aspiration or 10,000 CFU per mL in a catheterized specimen.                                                                                                                                                                                            |
| Lertdumrongluk 2021       | 214 (82) | NR                                                             | NR                               | NA                                        | Pyuria ( $\geq 5$ WBCs per high power field of centrifuged urine), and presence of positive urine culture (defined as $\geq 10^5$ CFU/mL of a single bacterial growth collected midstream in toilet-trained children or $\geq 10^4$ CFU/mL collected by urethral catheterization in uncontrolled toilet-trained children).                                          |
| Lytzen 2011               | 87 (90)  | During initial hospitalization                                 | NR (Outcome Reported in results) | Median 5.2 years (range 3.5 to 8.6 years) | Positive results for a urine culture were defined as any growth of bacteria in urine from a suprapubic bladder aspiration or more than 100,000 CFU per ml in 2 or eventually in 1 midstream urine sample.                                                                                                                                                           |
| Miron 2007                | NR       | Within 6 weeks of discharge                                    | NR (Outcome reported in results) | NR                                        | NR                                                                                                                                                                                                                                                                                                                                                                  |
| Montini 2009 <sup>a</sup> | NR       | No later than 10 days after commencement of antibiotic therapy | NR (Outcome reported in results) | 12 months                                 | Urinalysis of an uncentrifuged specimen (2 concordant consecutive tests) yielding a white blood cell count of 25 cells per L (1 with a dipstick) and urine culture (with urine collected by using sterile bags that were changed every 20 –30 minutes; 2 concordant consecutive tests were required) yielding growth of only 1 microorganism at 100 000 CFU per mL. |
| Pauchard 2017             | 96 (72)  | Within 6 days from admission                                   | NR (Outcome reported in results) | 24 months.                                | Positive urine culture was defined as a growth of a single microorganism $\geq 10^5$ CFU per mL with bladder catheterization, or any growth by suprapubic puncture.                                                                                                                                                                                                 |
| Pennesi 2012              | 366 (90) | 1 month after the UTI                                          | NR                               | NA                                        | Positive urinalysis (presence of leukocytes $\geq 50/\text{mm}^3$ and bacteria $\geq 10/\text{mm}^3$ at optical microscopy), and urine culture (1 million CFU/mL) for the same bacterium in two different samples. Urine for urinalysis and urine culture was collected using clean catch or bladder catheterization.                                               |
| Pennesi 2021              | 223 (84) | NR                                                             | NR                               | NA                                        | Urine samples were collected by clean voided urine or by bladder catheterization if clean catch was not possible. In febrile children in poor general clinical condition, urine samples were collected by transurethral bladder catheterization or suprapubic aspiration.                                                                                           |

|                     |          |                                                      |                                  |         |                                                                                                                                                                                                                                                                                                                                                                                                                                                                                |
|---------------------|----------|------------------------------------------------------|----------------------------------|---------|--------------------------------------------------------------------------------------------------------------------------------------------------------------------------------------------------------------------------------------------------------------------------------------------------------------------------------------------------------------------------------------------------------------------------------------------------------------------------------|
| Sasaki 2012         | NR       | NR                                                   | NR                               | NA      | NR                                                                                                                                                                                                                                                                                                                                                                                                                                                                             |
| Soccorso 2010       | 286 (67) | During admission                                     | NR (Outcome reported in results) | NR      | Culture-proven pure growth of an organism (>10 <sup>5</sup> colony-forming units/high-power field) from an appropriately collected urine sample. The sample was collected as a clean-catch midstream urine sample. Where this was not possible, a suprapubic aspirate was obtained.                                                                                                                                                                                            |
| Wallace 2020        | 180 (85) | During admission                                     | Surgical interventions           | 6 weeks | Urine specimens by either catheterization or suprapubic aspiration. For children 2 to 24 months of age, UTI was defined as 50,000 CFU of bacteria plus urinalysis with pyuria. Pyuria was defined as either a positive leukocyte esterase result and/or 5 WBC per high-power field. For infants, 2 months of age, infants could either have 50,000 CFUs of bacteria on urine culture regardless of the urinalysis result or 10,000 CFUs of bacteria with pyuria on urinalysis. |
| Wongbenc harat 2016 | NR       | Within 2 weeks after UTI was diagnosed               | NR                               | NA      | Both pyuria (>5 white blood cells/HPF) and positive urine culture (>10 <sup>3</sup> CFU/mL of a single uropathogenic organism on bladder catheterization)                                                                                                                                                                                                                                                                                                                      |
| Wong 2010           | 689 (84) | As soon as possible                                  | NR (Outcome reported in results) |         | Positive urinalysis (including dipstick for leucocyte esterase and nitrite and/or microscopy for leucocytes and bacteria) and significant urine culture of a properly collected urine sample.                                                                                                                                                                                                                                                                                  |
| Yilmaz 2016         | 268 (89) | Within 10 days of commencement of antibiotic therapy | NR                               | NA      | A positive urine culture of a single microorganism, and a colony count higher than 10 <sup>5</sup> CFU/ml. Urinary samples were obtained with the mid-stream clean-catch method in toilet-trained children and with a catheter in non-toilet-trained patients. A cut-off level of 50,000 CFU/ml was used in the latter group.                                                                                                                                                  |
| Zamir 2004          | 229 (85) | During hospitalization                               | NR                               | NA      | Positive urine culture, growth of >100 bacteria/ml in a midstream sample or any growth in suprapubic bladder aspiration or in/out bladder catheterization.                                                                                                                                                                                                                                                                                                                     |

190  
191  
192  
193

CFU refers to colony forming units \*Extracted data from related clinical trial.

NR, not reporter; NA, not applicable.

**eTable 5.** Kidney Ultrasound Reporting in Studies

| <b>Study</b>    | <b>Definition of Abnormal Renal Ultrasound</b>                                                                                                                                                                                                                                                                                                                               | <b>Grading of Hydronephrosis</b>                                                                                                                                     | <b>Radiologist review of US</b> | <b>Details on US review process</b>                     |
|-----------------|------------------------------------------------------------------------------------------------------------------------------------------------------------------------------------------------------------------------------------------------------------------------------------------------------------------------------------------------------------------------------|----------------------------------------------------------------------------------------------------------------------------------------------------------------------|---------------------------------|---------------------------------------------------------|
| Arlen 2014      | Any degree of calyceal or ureteral dilatation, parenchymal echogenicity or scarring, renal atrophy, alterations in corticomedullary-differentiation or urothelial thickening.                                                                                                                                                                                                | SFU                                                                                                                                                                  | NR                              | NR                                                      |
| Breinbjerg 2021 | The findings of kidney US were noted. Hydronephrosis was defined as pelvis anteroposterior diameter > 10 mm or calyces anteroposterior diameter > 5 mm; hydroureter was defined as a distal ureter > 3 mm.                                                                                                                                                                   | Hydronephrosis was defined as pelvis anteroposterior diameter > 10 mm or calyces anteroposterior diameter > 5 mm; hydroureter was defined as a distal ureter > 3 mm. | NR                              | NR                                                      |
| Cheng 2011      | NR                                                                                                                                                                                                                                                                                                                                                                           | Mild hydronephrosis (pelvic dilatation 10 mm or less)                                                                                                                | NR                              | NR                                                      |
| Han 2016        | NR                                                                                                                                                                                                                                                                                                                                                                           | NR                                                                                                                                                                   | NR                              | NR                                                      |
| Harper 2016     | Post-UTI sonographic findings showing any degree of hydronephrosis, dilatation of calyces or ureter, signs of renal dysplasia, or abnormal renal outline were considered to indicate an abnormality.                                                                                                                                                                         | NR                                                                                                                                                                   | NR                              | NR                                                      |
| Hoberman 2003   | Anatomic abnormalities. Dilated pelvis, Pelvocaliectasis, Hydronephrosis, Dilated ureter, Double collecting system, Extrarenal pelvis, Calculus.                                                                                                                                                                                                                             | NR                                                                                                                                                                   | NR                              | NR                                                      |
| Hsu 2016        | All abnormal US findings were recorded, including the anteroposterior diameter of the renal pelvis ≥5mm and/or any grade of dilatation of the calyces or ureters irrespective of anteroposterior diameter; pelvic or ureteral wall thickening; absence of cortico-medullary differentiation; renal hypoplasia; duplicated renal collecting system; and abnormal kidney size. | NR                                                                                                                                                                   | NR                              | NR                                                      |
| Huang 2008      | NR                                                                                                                                                                                                                                                                                                                                                                           | NR                                                                                                                                                                   | NR                              | All ultrasound scans were reviewed by at least three to |

|                  |                                                                                                                                                                                                                                                                                                                                                                                                                                                                                                                                                                                                                                                                                                                                                                                                                                                                                                                                |                                 |                                                                           |                                                                                                                   |
|------------------|--------------------------------------------------------------------------------------------------------------------------------------------------------------------------------------------------------------------------------------------------------------------------------------------------------------------------------------------------------------------------------------------------------------------------------------------------------------------------------------------------------------------------------------------------------------------------------------------------------------------------------------------------------------------------------------------------------------------------------------------------------------------------------------------------------------------------------------------------------------------------------------------------------------------------------|---------------------------------|---------------------------------------------------------------------------|-------------------------------------------------------------------------------------------------------------------|
|                  |                                                                                                                                                                                                                                                                                                                                                                                                                                                                                                                                                                                                                                                                                                                                                                                                                                                                                                                                |                                 |                                                                           | ensure uniform findings.                                                                                          |
| Hung 2016        | All abnormal US findings were recorded, including 7-mm anteroposterior diameter of the renal pelvis, and/or any grade of dilatation of the calyces or ureters irrespective of anteroposterior diameter; pelvic or ureteral wall thickening; absence of cortico-medullary differentiation; irregular renal outline and signs of renal hypoplasia (i.e., small kidney and thinned or hyperechoic cortex); duplicated renal collecting system, abnormal kidney size, renal cysts, dysplastic kidney, stenosis of the ureteropelvic junction, or ureterovesical junction and ureterocele. Renal hypoplasia was defined as a longitudinal length of kidney less than 2 standard deviations for age, and nephromegaly as a renal length greater than 2 standard deviations for age. Examination of the bladder was also performed to detect dilatation of the distal ureters, bladder wall hypertrophy, and presence of ureterocele. | NR                              | NR                                                                        | At least two investigators reviewed all US reports to ensure uniform findings.                                    |
| Ipek 2012        | NR                                                                                                                                                                                                                                                                                                                                                                                                                                                                                                                                                                                                                                                                                                                                                                                                                                                                                                                             | NR                              | NR                                                                        | NR                                                                                                                |
| Ismaili 2011     | The criteria for abnormal US included pelvic anteroposterior diameter 7-mm, calyceal or ureteral dilatation, pelvic or ureteral wall thickening, absence of the corticomedullary differentiation, and signs of renal dysplasia (small kidney, thinned or hyperechogenic cortex, and cortical cysts).                                                                                                                                                                                                                                                                                                                                                                                                                                                                                                                                                                                                                           | NR                              | Same trained pediatric radiologists performed US.                         | NR                                                                                                                |
| Jahnukainen 2006 | An abnormal US finding was considered significant if treatment (surgical intervention, prophylactic antibiotics, need for follow-up, or counsel-ling) was influenced based on the result of US. Abnormalities, such as ureteropelvic junction obstruction, ureterovesical junction obstruction, urethral valve, ureterocele, solitary kidney, cystic kidney diseases, renal dysplasia, or hypoplasia were considered as potential conditions that would change the treatment and that are usually not visualised by VCUG.                                                                                                                                                                                                                                                                                                                                                                                                      | Posteroanterior diameter >10 mm | Experienced pediatric radiologists performed and analysed US.             | The imaging study reports were reviewed by two Pediatricians. A pediatric radiologist was consulted as necessary. |
| Kawai 2019       | Renal US findings were recorded on a standard sheet documenting renal length, ureteral dilatation, kidney/bladder tumor lesions, calculus, bladder volume, degree of bladder retention, bladder wall thickness. Abnormal findings indicating need for VCUG were: unilateral renal agenesis, double renal pelvis and ureters,                                                                                                                                                                                                                                                                                                                                                                                                                                                                                                                                                                                                   | SFU                             | Physician in outpatient department (pediatrics or pediatric urology) or a | The pediatricians and technicians were provided with standardized                                                 |

|                     |                                                                                                                                                                                                                                                                                                                                                                                                                                                                                                                                                                                                                                                                                                                                                                        |     |                                                    |                                                                                                       |
|---------------------|------------------------------------------------------------------------------------------------------------------------------------------------------------------------------------------------------------------------------------------------------------------------------------------------------------------------------------------------------------------------------------------------------------------------------------------------------------------------------------------------------------------------------------------------------------------------------------------------------------------------------------------------------------------------------------------------------------------------------------------------------------------------|-----|----------------------------------------------------|-------------------------------------------------------------------------------------------------------|
|                     | Left/Right renal length difference >10mm, renal length <45mm, hydronephrosis> grade 2 based on SFU, ureteral dilation, bladder volume >150% expected bladder volume.                                                                                                                                                                                                                                                                                                                                                                                                                                                                                                                                                                                                   |     | lab technician performed US.                       | data recording sheets to avoid discrepancies in inter-examiner diagnosis                              |
| Kobayashi 2019      | Renal ultra-sonography was interpreted as follows: renal length was considered abnormal if it was $\geq 2$ SD of the mean in comparison with the age-based reference range for Japanese children. Dilation of the renal pelvis was graded according to the definition of the Society of Fetal Urology (SFU). We defined abnormal findings as SFU grade $\geq 2$ , which corresponds to moderate–severe dilation of the renal pelvis and calices; anteroposterior diameter of ureter $\geq 7$ mm, which corresponds to moderate–severe dilation of ureter; and renal pelvic wall thickness $\geq 0.8$ mm.                                                                                                                                                               | SFU | Pediatric radiologists performed and evaluated US. | NR                                                                                                    |
| Lee 2009            | All abnormal ultrasound scanning findings were recorded, including dilatation of the pelvis, calyx, or ureter (any dilatation of ureter seen on ultrasound scanning), cyclic dilatation of pelvicaliceal system, wall thickening in the pelvis (a circumferential hypo-echoic rim delineated on each side by thin hyperechoic lines, the rim being thicker than 0.8 mm), ureter, or bladder (3mm in a full or 5 mm in an empty bladder), swelling or thinning of renal parenchyma, diffuse or focal increased renal echogenicity with absence of corticomedullary differentiation, renal abscess, irregular renal outline, and signs of renal hypodysplasia (small kidney, thinned or hyperechoic cortex, and cortical cysts) or a duplicated renal collecting system. | SFU | Performed by a pediatric nephrologist.             | NR                                                                                                    |
| Lertdumrongluk 2021 | Hydronephrosis, double collecting system, increased parenchymal echogenicity, and ectopic kidney.                                                                                                                                                                                                                                                                                                                                                                                                                                                                                                                                                                                                                                                                      | NR  | Qualified radiologists performed US.               | NR                                                                                                    |
| Lytzen 2011         | NR                                                                                                                                                                                                                                                                                                                                                                                                                                                                                                                                                                                                                                                                                                                                                                     | NR  | NR                                                 | NR                                                                                                    |
| Miron 2007          | Grading of ultrasonographic renal findings was divided into normal, mild, moderate and severe (hydronephrosis) pelvic dilatation and according to other specified findings.                                                                                                                                                                                                                                                                                                                                                                                                                                                                                                                                                                                            | NR  | Expert in pediatric radiology read US.             | Radiologists was unaware of the purpose of the study and blinded to the results of the antenatal RUS. |

|               |                                                                                                                                                                                                                                                                                                                                                                                                                                  |                                              |                                              |                                                                                                                                       |
|---------------|----------------------------------------------------------------------------------------------------------------------------------------------------------------------------------------------------------------------------------------------------------------------------------------------------------------------------------------------------------------------------------------------------------------------------------|----------------------------------------------|----------------------------------------------|---------------------------------------------------------------------------------------------------------------------------------------|
| Montini 2009  | Any alteration, however minor. The ultrasound results were considered positive even when the morphologic changes were minimal (for example, mild dilation of the renal pelvis, mild increase in renal volume, any discernable increase in the thickness of the pelvic mucosa, or debris present in the bladder)                                                                                                                  | NR                                           | Qualified radiologists performed US          | The radiologists were blinded to clinical, laboratory, and other data regarding the patients.                                         |
| Pauchard 2017 | Renal pelvic anteroposterior diameter $\geq 5$ mm, and/or any grade of dilatation of calyces or ureters, and/or pelvic or ureteral wall thickening.                                                                                                                                                                                                                                                                              | NR                                           | Trained pediatric radiologists performed US. |                                                                                                                                       |
| Pennesi 2012  | Either abnormal renal length—maximum longitudinal diameter <5th percentile—ureteral dilatation, pelvic dilatation or abnormal cortico-medullary differentiation                                                                                                                                                                                                                                                                  |                                              | Skilled radiologists performed US            | NR                                                                                                                                    |
| Pennesi 2021  | Hydronephrosis, ureteric dilatation, hypoplasia, duplicated system, bladder abnormalities                                                                                                                                                                                                                                                                                                                                        | SINEPE guidelines, which references the SFU. | US performed in radiology department.        | NR                                                                                                                                    |
| Sasaki 2012   | NR                                                                                                                                                                                                                                                                                                                                                                                                                               | NR                                           | NR                                           | NR                                                                                                                                    |
| Soccorso 2010 | The US examination was considered normal in the case of bilateral normal kidneys, with no evidence of hydroureteronephrosis or bladder abnormality.                                                                                                                                                                                                                                                                              | NR                                           | Pediatric radiologists reported US.          | Six paediatric radiologists reported individual imaging studies and were blinded to the reports of other studies for the same infant. |
| Wallace 2020  | Threshold A findings were mild abnormalities that could be incidental findings or related to the UTI itself. Threshold B findings were moderate abnormalities that could lead to medical interventions, further testing or need for subspecialty involvement. Threshold C findings were considered to be severe abnormalities for which close subspecialty follow-up and possible future surgical interventions might be needed. | SFU                                          | Pediatric radiologists read each US          | As part of clinical care, pediatric radiology staff read each US examination.                                                         |

|                    |                                                                                                                                                                                                                                                                                                                                                                                                                    |                                                                                                                    |                                         |    |
|--------------------|--------------------------------------------------------------------------------------------------------------------------------------------------------------------------------------------------------------------------------------------------------------------------------------------------------------------------------------------------------------------------------------------------------------------|--------------------------------------------------------------------------------------------------------------------|-----------------------------------------|----|
| Wongbencharat 2016 | All abnormal RBUS findings were recorded including swelling or thinning of renal parenchyma, diffuse or focal increased renal echogenicity with absence of corticomedullary differentiation, signs of renal hypodysplasia, duplicated collecting system and dilatation of the calyx, pelvis, ureter or urethra.                                                                                                    | NR                                                                                                                 | Experienced radiologists performed US.  | NR |
| Wong 2010          | For US, the bilateral renal length, pelvicaliceal or ureteric dilatation, pre-and post-void bladder volumes were assessed. The magnitude of renal pelvic dilatation was defined by the maximal anteroposterior diameter (APD) of the pelvis measured in the transverse plane (considered as abnormal if >5 mm).                                                                                                    | Unclear                                                                                                            | Radiologists performed and reported US. |    |
| Yilman 2016        | Hydronephrosis, renal hypoplasia/ dysplasia, renal cysts, a duplicated collecting system, and urolithiasis were defined as abnormal US findings.                                                                                                                                                                                                                                                                   | NR                                                                                                                 | NR                                      | NR |
| Zamir 2004         | It consisted of examination of the kidneys in order to show the kidney size, renal outlet obstruction (such as pelvico-uretero junction stenosis), collecting system dilatation, parenchymal structure, and parenchymal lesions such as an abscess. Also examination of the bladder was done in order to identify dilatation of the distal ureters, hypertrophy of the bladder wall, and presence of ureteroceles. | Renal pelvis dilatation was defined as suggestive of VUR and graded as mild, moderate, or severe (hydronephrosis). | Experienced radiologists read US.       | NR |

197 Descriptions are include text from primary studies; SFU = Society of Fetal Urology classification system.

NR, not reported.

198



199 **eResults.** Sensitivity Analyses for Outcome of Urinary Tract Abnormalities

200  
201 For the analysis of prevalence of any ultrasound abnormality, Lee et al.<sup>46</sup> and Han et al.<sup>53</sup> were identified  
202 as an outliers, however, when these studies were individually removed in the sensitivity analyses, the  
203 overall prevalence was not substantially impacted (21.0%, 95% CI 16.1%-26.5% and 20.7%, 95% CI,  
204 16.1-25.6, respectively).  
205

206 **eTable 6.** Prevalence of specific abnormalities detected on kidney ultrasound after first  
 207 episode febrile urinary tract infection  
 208

| Abnormality                                        | Studies Reporting, No. | No. with Abnormality | Total No. | Pooled Prevalence (95% CI) | <i>I</i> <sup>2</sup> |
|----------------------------------------------------|------------------------|----------------------|-----------|----------------------------|-----------------------|
| Hydronephrosis                                     | 21                     | 843                  | 6848      | 9.2 (5.1-14.3)             | 98%                   |
| Pelviectasis/Dilated Pelvis                        | 10                     | 259                  | 3920      | 6.0 (2.3-11.2)             | 96%                   |
| Dilated Ureter                                     | 10                     | 106                  | 3401      | 2.9 (1.3-5.2)              | 89%                   |
| Other Bladder abnormalities                        | 5                      | 44                   | 1962      | 2.0 (1.2-3.0)              | 48%                   |
| Double collecting system                           | 17                     | 88                   | 5636      | 1.4 (0.7- 2.3)             | 81%                   |
| Ureterocele                                        | 5                      | 15                   | 1742      | 0.8 (0.4–1.3)              | 0%                    |
| Solitary Kidney                                    | 3                      | 6                    | 852       | 0.7 (0.2-1.4)              | 0%                    |
| Multicystic/Polycystic Kidney                      | 6                      | 7                    | 1455      | 0.4 (0.1-0.8)              | 0%                    |
| Urinary Tract Obstruction                          | 12                     | 23                   | 3761      | 0.4 (0.1-0.8)              | 59%                   |
| Dilated Posterior Urethra/Posterior Urethral Valve | 3                      | 3                    | 1017      | 0.2 (0-0.9)                | 47%                   |
| Extrarenal Pelvis                                  | 2                      | 1                    | 1129      | 0.1 (0-0.7)                | 58%                   |
| Calculus                                           | 4                      | 4                    | 1894      | 0.1 (0-0.3)                | 7%                    |
| Abnormal Corticomedullary Differentiation          | 2                      | 0                    | 933       | 0.0 (0-0.2)                | 0%                    |

Pooled prevalence from random effects meta-analysis

209  
 210  
 211

212 **eFigure 1. Pooled Prevalence of Urinary Tract Abnormalities Detected on Kidney**  
 213 **Ultrasound After First Febrile Urinary Tract Infection in Children, Subgroup Analyses**

214  
 215 a. Retrospective vs. Prospective Study Design

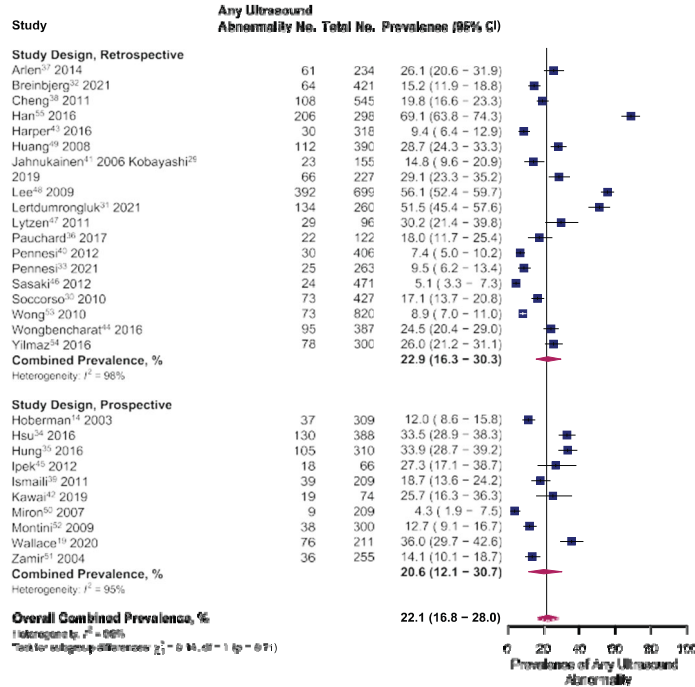

216  
 217  
 218 b. Hospitalized vs. Inclusion of Non-hospitalized Study Setting

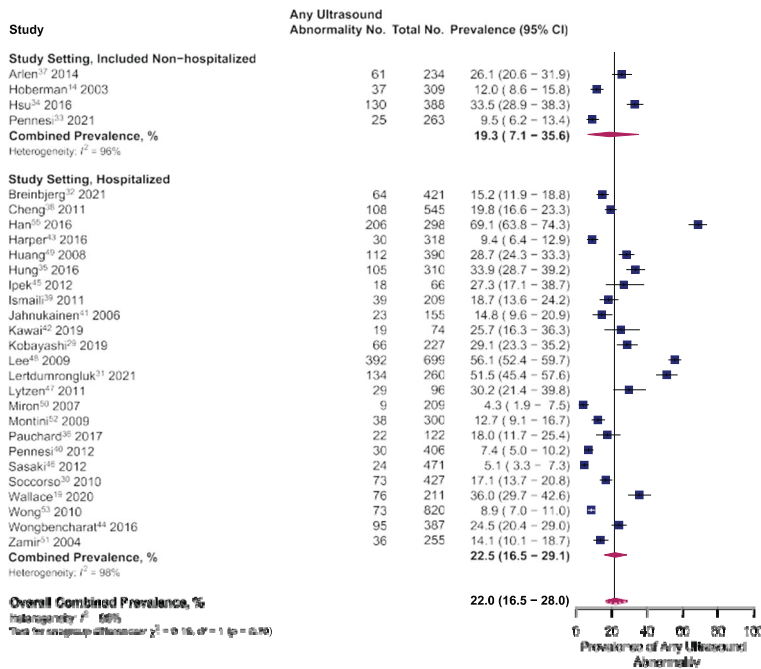

221 c. Recruitment End Date 2000-2010 vs. after 2010

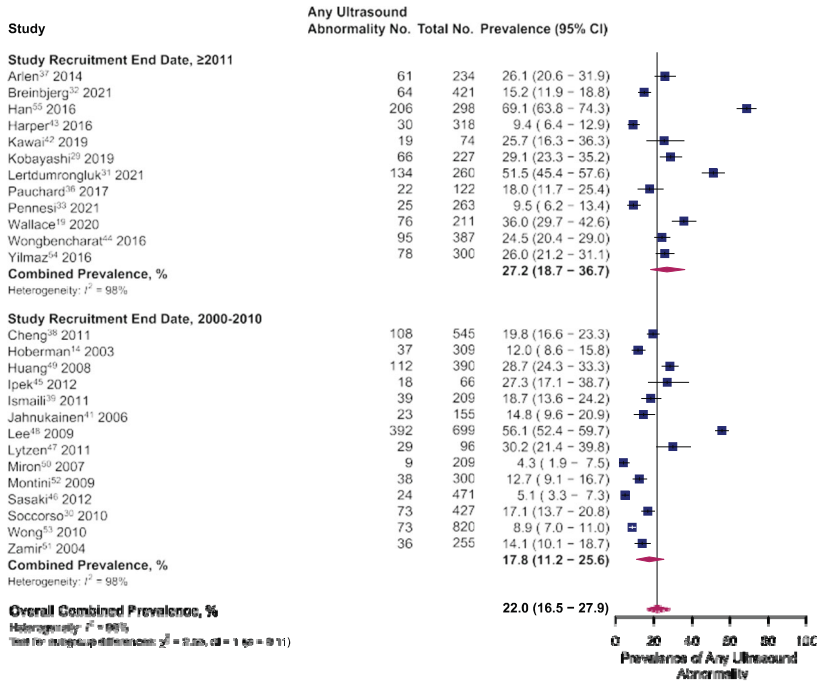

222  
223 d. Pyuria included in Urinary Tract Infection Diagnosis Criteria

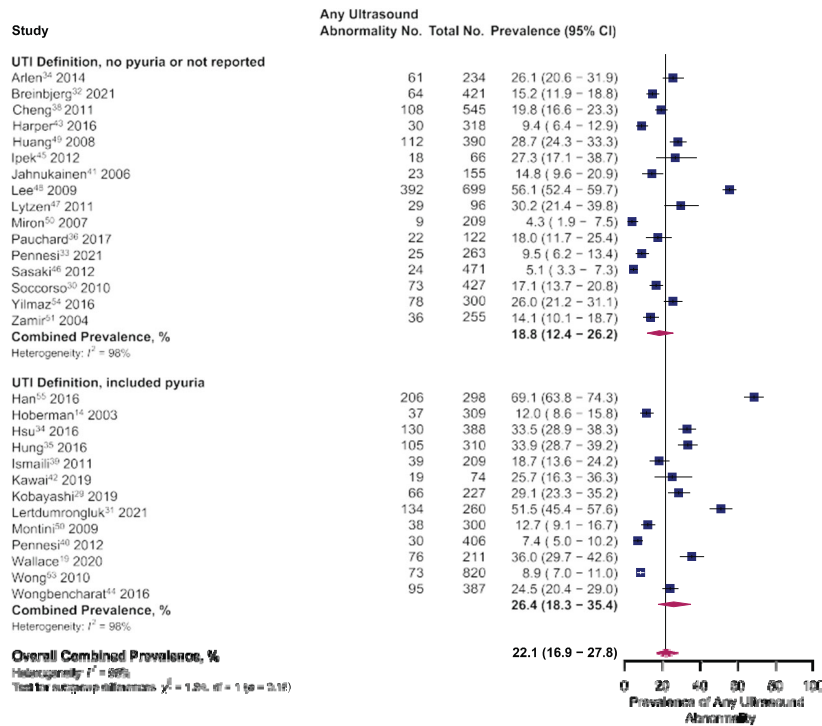

224

e. Study Quality Item: Participant Recruitment Appropriate and Clear

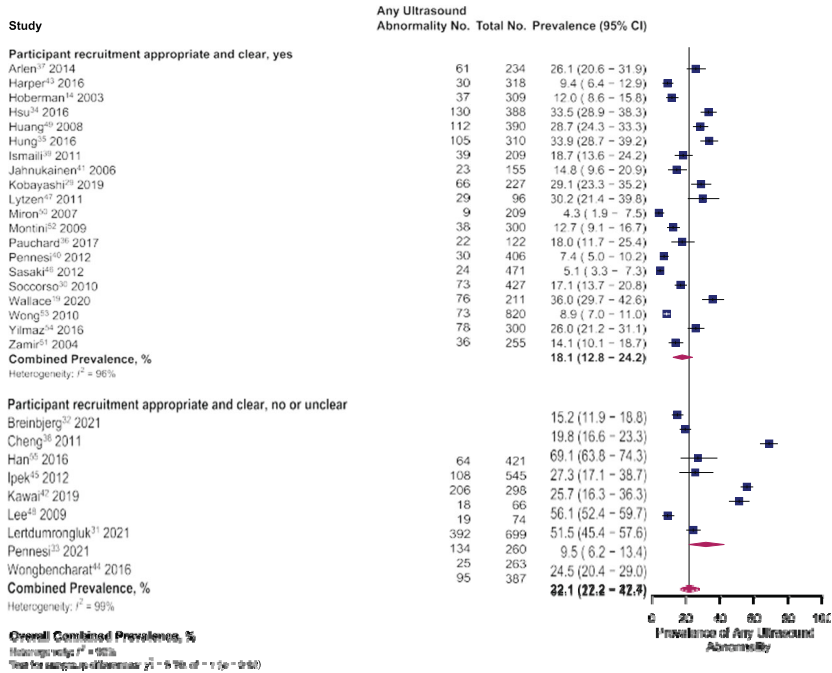

f. Study Quality Item: Standard Criteria Described for Abnormalities on Renal Ultrasound

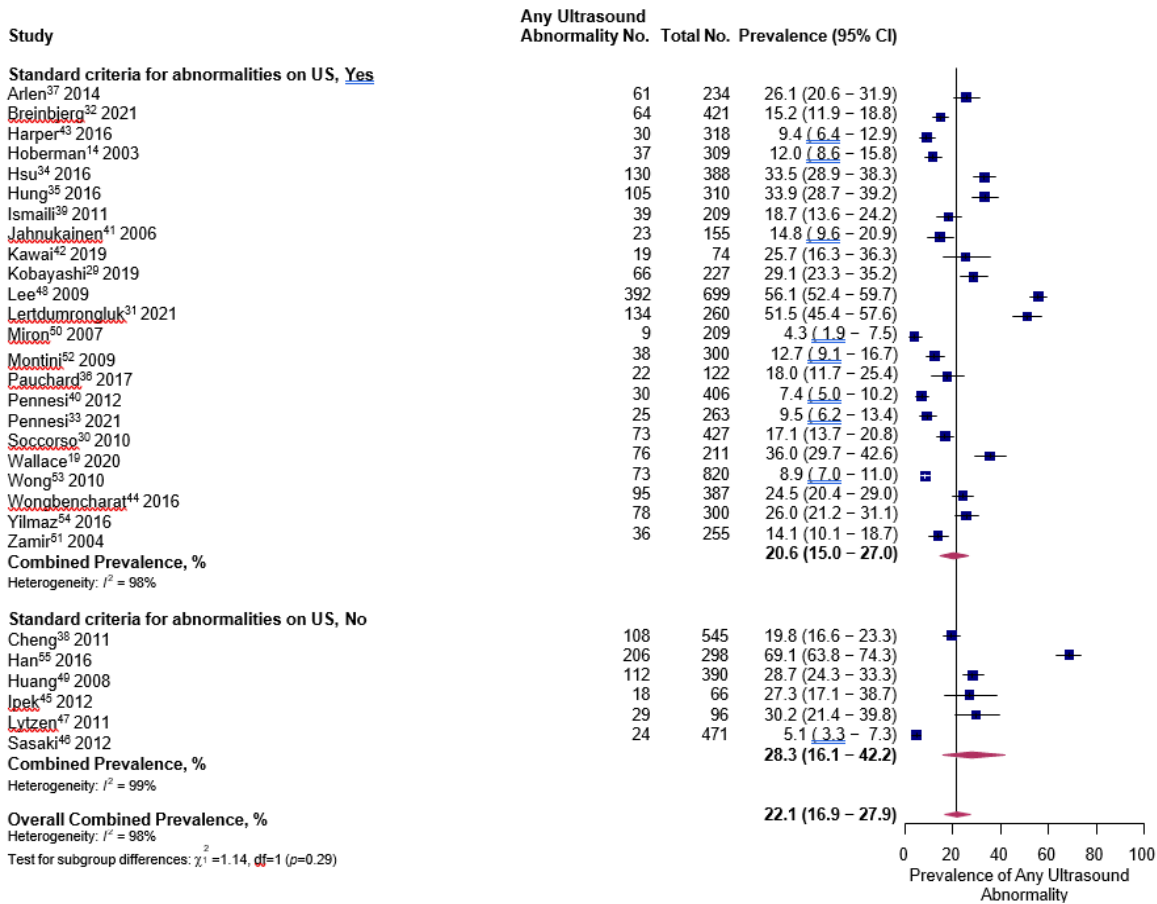

232  
 233 eFigure 3. Pooled Prevalence of Specific Abnormalities Detected on Kidney Ultrasound  
 234 After First Febrile Urinary Tract Infection in Children  
 235

236 a. Hydronephrosis

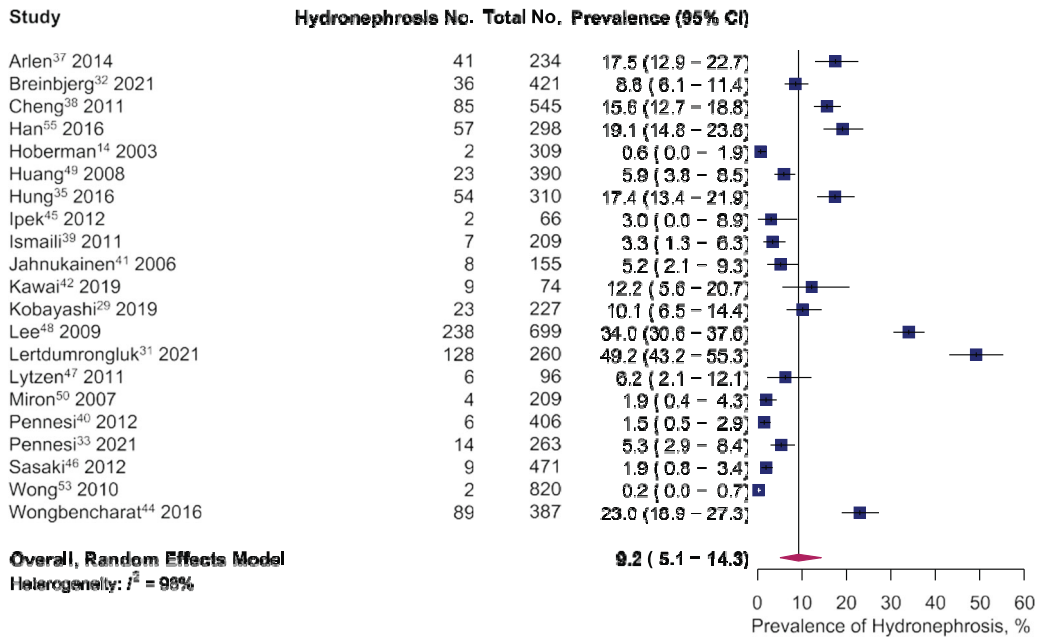

237  
 238 b. Pelviectasis/Dilated Pelvis  
 239

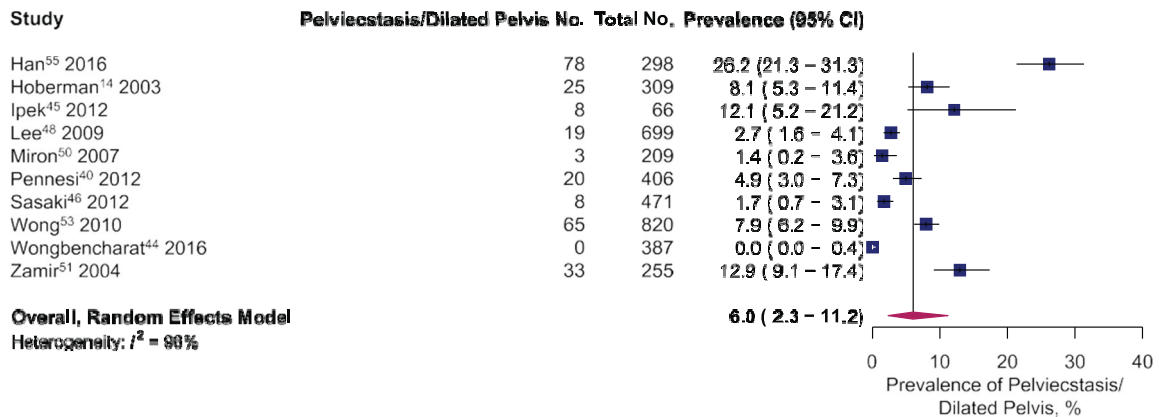

240

241  
 242 c. Dilated Ureter  
 243

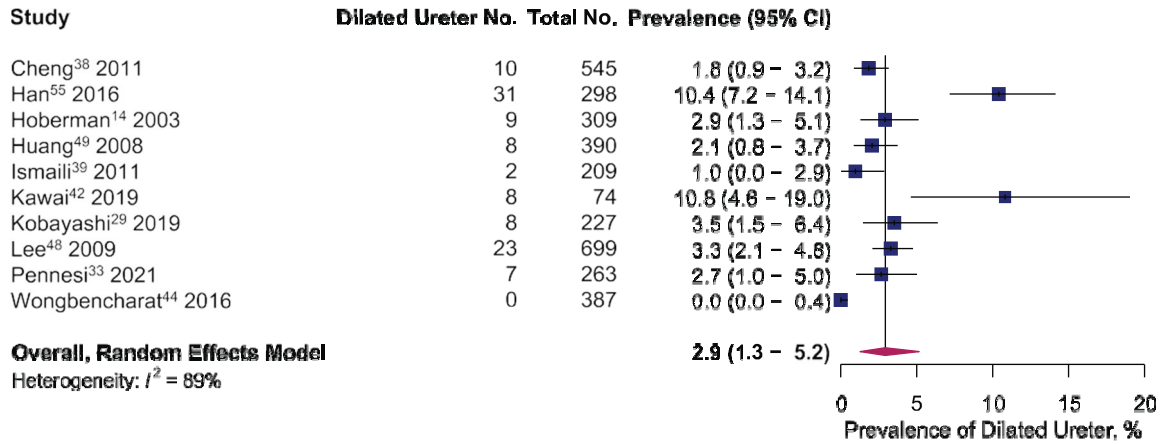

244  
 245  
 246 d. Other Bladder Abnormalities  
 247

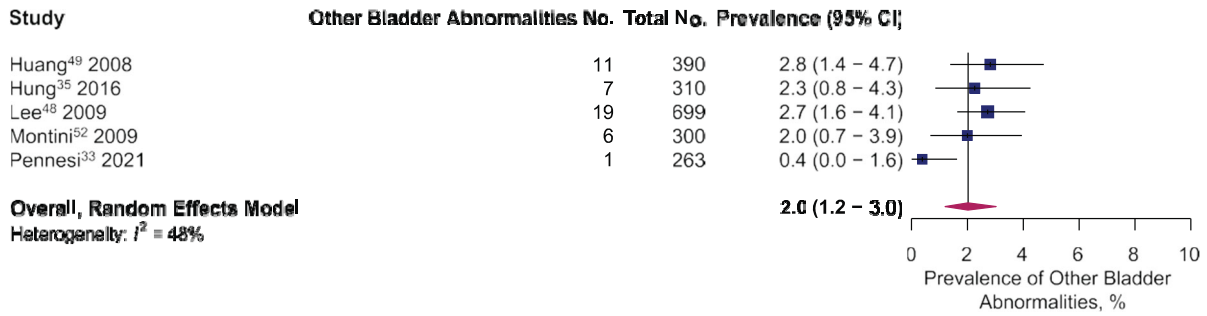

248  
 249  
 250  
 251  
 252  
 253  
 254  
 255  
 256  
 257

258  
 259  
 260 e. Double Collecting System  
 261

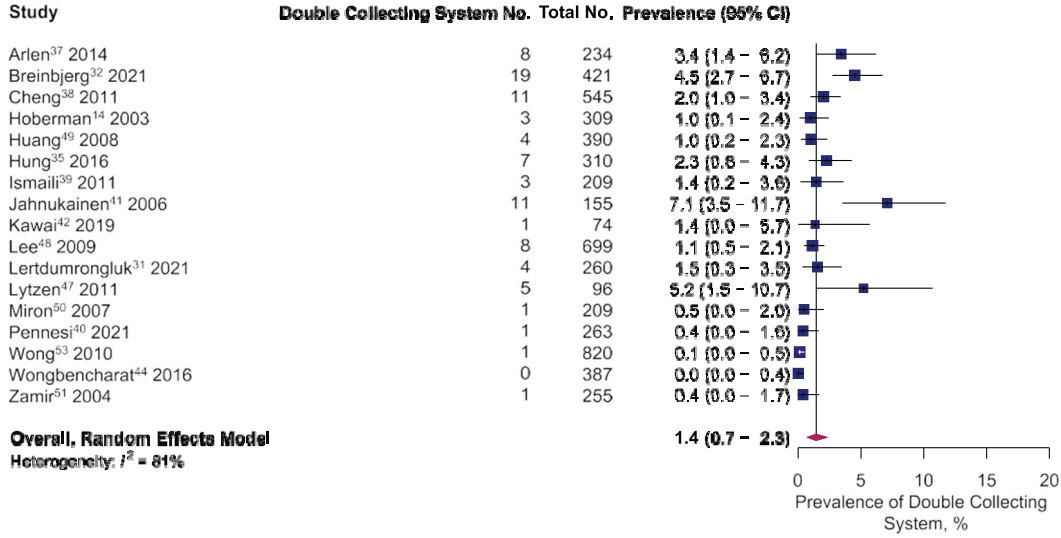

262  
 263 f. Ureterocele  
 264

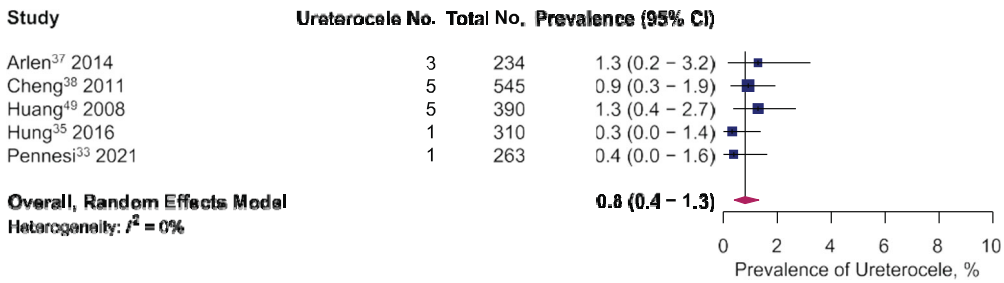

265  
 266



267  
 268 g. Extrarenal Pelvis  
 269

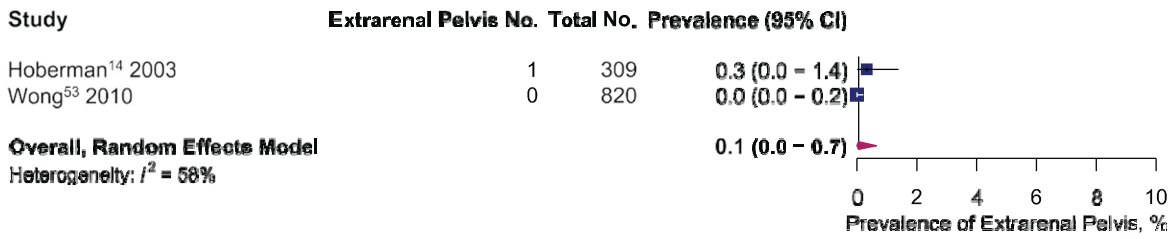

270  
 271 h. Solitary Kidney  
 272

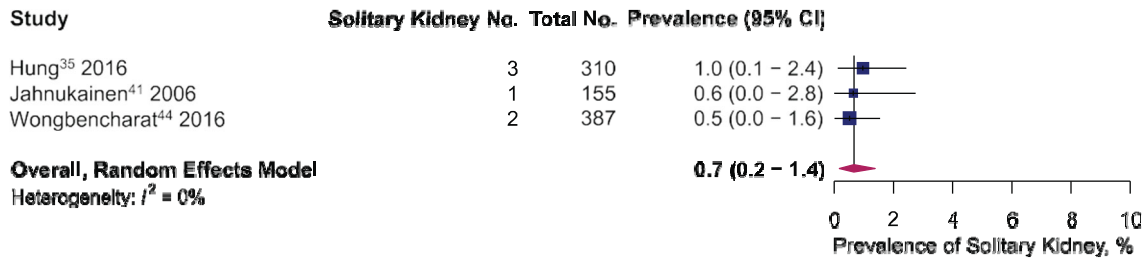

273  
 274 i. Multicystic/Polycystic Kidney  
 275  
 276

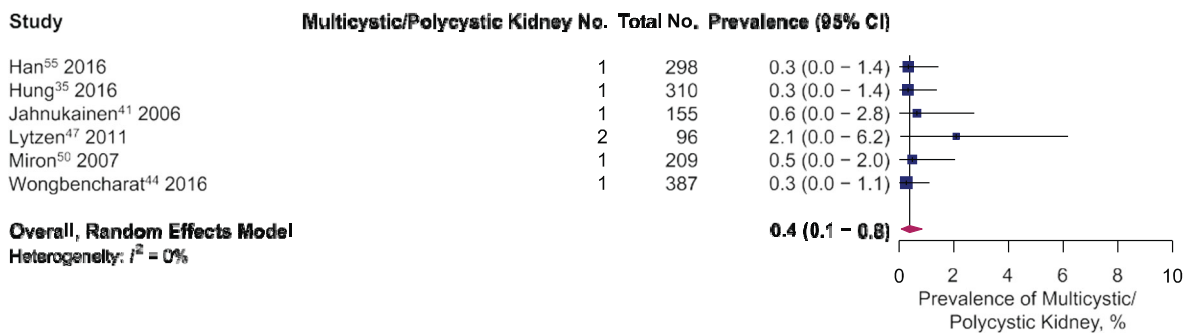

277  
 278  
 279  
 280  
 281  
 282  
 283

284  
 285  
 286 j. Urinary Tract Obstruction  
 287

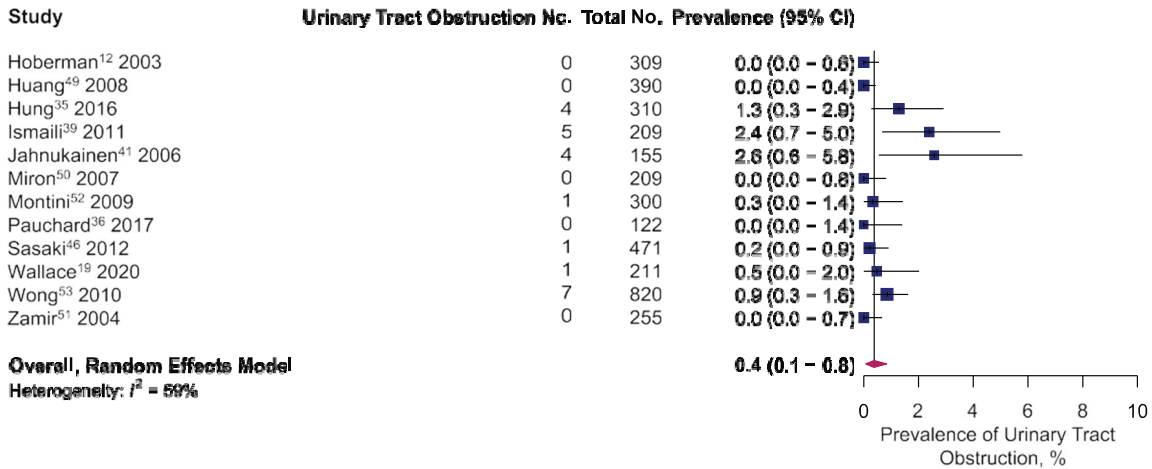

288  
 289 k. Dilated Posterior Urethra/Posterior Urethral Valve  
 290

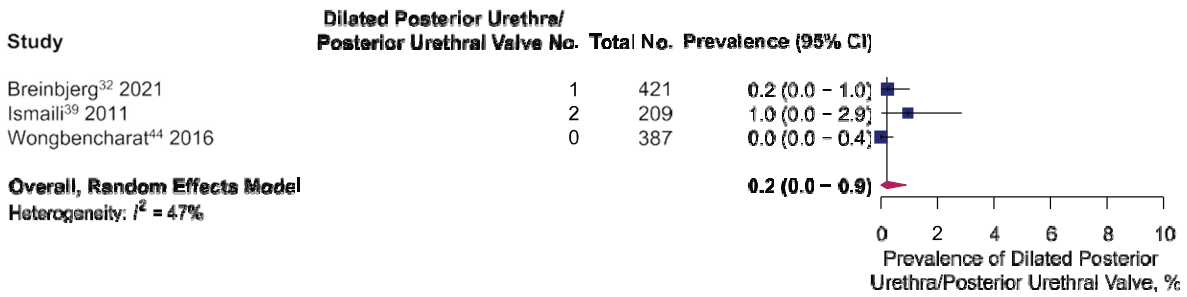

291  
 292  
 293 l. Calculus  
 294

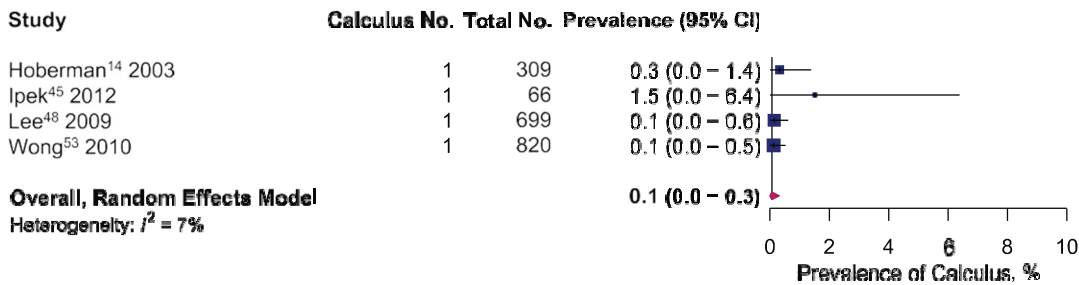

295  
 296  
 297

298  
299  
300  
301  
302

m. Abnormal Corticomedullary Differentiation

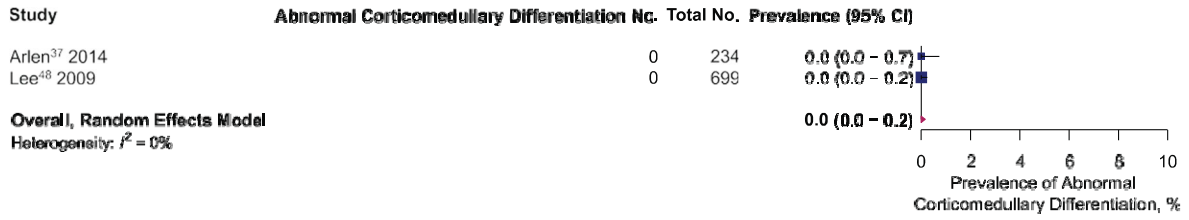

303  
304

305 eFigure 4. Pooled Prevalence of Surgical Intervention of the Urinary Tract

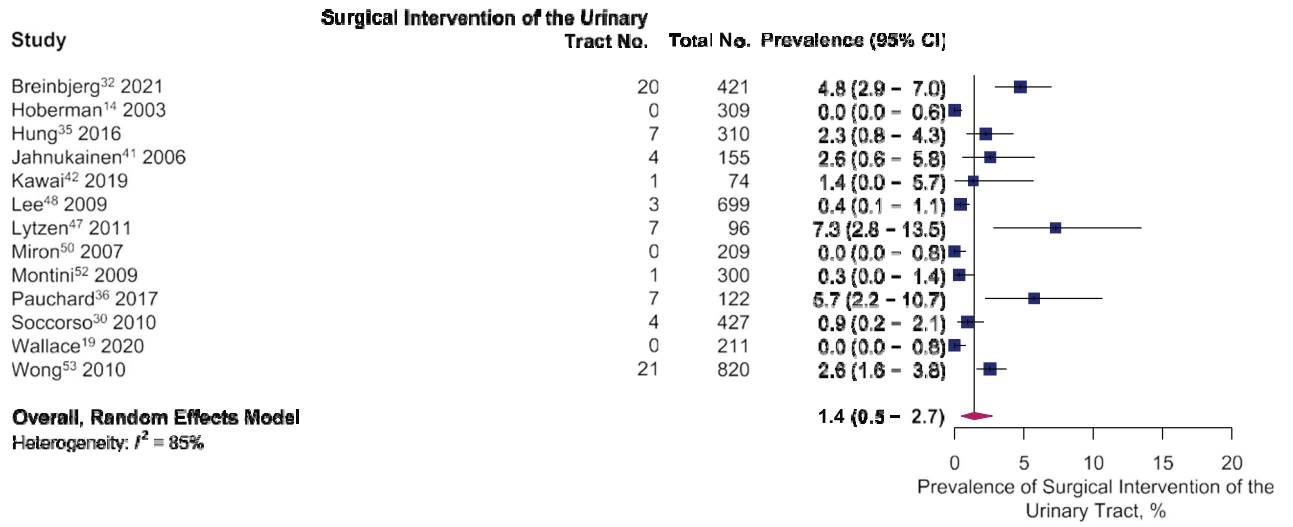

306
