# Supplementary material
Source: PubMed Central journal article supplement (PMC10230373)
Supplement: jamapediatr-e231387-s002.pdf [file jamapediatr-e231387-s002.pdf]

| <b>*Group Name(s): Canadian Paediatric Inpatient Research Network (PIRN)</b> |                   |                              |                         |                                                                             |                                                 |                                                                |                                                                                                   |
|------------------------------------------------------------------------------|-------------------|------------------------------|-------------------------|-----------------------------------------------------------------------------|-------------------------------------------------|----------------------------------------------------------------|---------------------------------------------------------------------------------------------------|
| <b>*First Name and Middle Initial(s)</b>                                     | <b>*Last Name</b> | <b>*Suffix (eg, Jr, III)</b> | <b>Academic Degrees</b> | <b>Institution</b>                                                          | <b>Location (city, state/province, country)</b> | <b>Role or Contribution, eg, chair, principal investigator</b> | <b>Group (if more than 1 Group listed in the byline) and/or Subgroup (eg, Steering Committee)</b> |
| Ann                                                                          | Bayliss           |                              | MD FRCPC                | Trillium Health Partners, University of Toronto                             | Mississauga, Ontario                            | Site Lead                                                      |                                                                                                   |
| Mahmoud                                                                      | Sakran            |                              | MD                      | Lakeridge Health, Queens University                                         | Oshawa, Ontario                                 | Site Lead                                                      |                                                                                                   |
| Kim                                                                          | Zhou              |                              | MD FRCPC                | North York General Hospital, University of Toronto                          | Toronto, Ontario                                | Site Lead                                                      |                                                                                                   |
| Rachel                                                                       | Pearl             |                              | MD FRCPC                | William Osler Health System, University of Toronto                          | Brampton, Ontario                               | Site Lead                                                      |                                                                                                   |
| Lucy                                                                         | Giglia            |                              | MD FRCPC                | McMaster Children's Hospital, McMaster University                           | Hamilton, Ontario                               | Site Lead                                                      |                                                                                                   |
| Radha                                                                        | Jetty             |                              | MD FRCPC                | Children's Hospital of Eastern Ontario, University of Ottawa                | Ottawa, Ontario                                 | Site Lead                                                      |                                                                                                   |
| Anupam                                                                       | Sehgal            |                              | MD                      | Kingston General Hospital , Queens University                               | Kingston, Ontario                               | Site Lead                                                      |                                                                                                   |
| Sepideh                                                                      | Taheri            |                              | MBChB FRCPCH            | Children's Hospital at London Health Sciences Centre, Western University    | London, Ontario                                 | Site Lead                                                      |                                                                                                   |
| Geert                                                                        | tJong             |                              | MD                      | Health Sciences Centre Winnipeg Children's Hospital, University of Manitoba | Winnipeg, Manitoba                              | Site Lead                                                      |                                                                                                   |
| Kristopher                                                                   | Kang              |                              | MD                      | BC Children's Hospital                                                      | Vancouver, British Columbia                     | Site Lead                                                      |                                                                                                   |
| Jessica                                                                      | Foulds            |                              | MD FRCPC                | Stollery Children's Hospital, University of Alberta                         | Edmonton, Alberta                               | Site Lead                                                      |                                                                                                   |
| Gemma                                                                        | Vomiera           |                              | MD                      | Alberta Children's Hospital                                                 | Calgary, Alberta                                | Site Lead                                                      |                                                                                                   |
| Raman                                                                        | Chawla            |                              | MD                      | Alberta Children's Hospital                                                 | Calgary, Alberta                                | Site Lead                                                      |                                                                                                   |
| Joanna                                                                       | Holland           |                              | MD                      | IWK Health Centre, Dalhousie University                                     | Halifax, New Brunswick                          | Site Lead                                                      |                                                                                                   |

| <b>*First Name and Middle Initial(s)</b> | <b>*Last Name</b> | <b>*Suffix (eg, Jr, III)</b> | <b>Academic Degrees</b>  | <b>Institution</b>                                            | <b>Location (city, state/province, country)</b> | <b>Role or Contribution, eg, chair, principal investigator</b> | <b>Group (if more than 1 Group listed in the byline) and/or Subgroup (eg, Steering Committee)</b> |
|------------------------------------------|-------------------|------------------------------|--------------------------|---------------------------------------------------------------|-------------------------------------------------|----------------------------------------------------------------|---------------------------------------------------------------------------------------------------|
| Olivier                                  | Drouin            |                              | MDCM<br>MSc MPH<br>FRCPC | CHU Sainte-Justine, University of Montreal                    | Montreal, Quebec                                | Site Lead                                                      |                                                                                                   |
| Evelyn                                   | Constantin        |                              | MD MSc<br>FRCPC          | Montreal Children's Hospital, McGill University Health Centre | Montreal, Quebec                                | Site Lead                                                      |                                                                                                   |
| Patricia                                 | Li                |                              | MD MSc<br>FRCPC          | McGill University Health Centre, Montreal Health Centre       | Montreal, Quebec                                | Site Lead                                                      |                                                                                                   |
