# Supplementary material
Source: PubMed Central journal article supplement (PMC10230373)
Supplement: jamapediatr-e231387-s003.pdf [file jamapediatr-e231387-s003.pdf]

## Data Sharing Statement

Yang. Kidney Ultrasonography After First Febrile Urinary Tract Infection in Children. *JAMA Pediatr*. Published May 30, 2023. doi:10.1001/jamapediatrics.2023.1387

### Data

**Data available:** No

### Additional Information

**Explanation for why data not available:** This is a meta-analysis and we do not have individual patient data.
